# Supplementary material for: Modified carbon paste ion selective electrode for determining Cr(iii) ions in aqueous solutions and some real samples using tetragonal zirconia nanoparticles
Source: Royal Society of Chemistry journal article supplement (doi:10.1039/d3ra01563g), 2023-01-01
Supplement: d3ra01563g1.pdf [file d3ra01563g1.pdf]

## Synthesis and characterization of tetragonal zirconia nanoparticles for use in a carbon paste ion selective electrode to determine Cr(III) ions in aqueous solutions and some real samples

Omar A. Fouad<sup>1\*</sup>, Mohamed M.S. Wahsh<sup>2</sup>, Gehad G. Mohamed<sup>1,3</sup>, Maher MI El Dessouky<sup>1</sup>,  
Maysa R. Mostafa<sup>1</sup>

<sup>1</sup> Chemistry Department, Faculty of Science, Cairo University, 12613 Giza, Egypt

<sup>2</sup> Refractories, Ceramics and Building Materials Department, National Research Centre, 12622, Cairo, Egypt

<sup>3</sup> Nanoscience Department, Basic and Applied Sciences Institute, Egypt-Japan University of Science and Technology, New Borg El Arab, Alexandria, 21934, Egypt

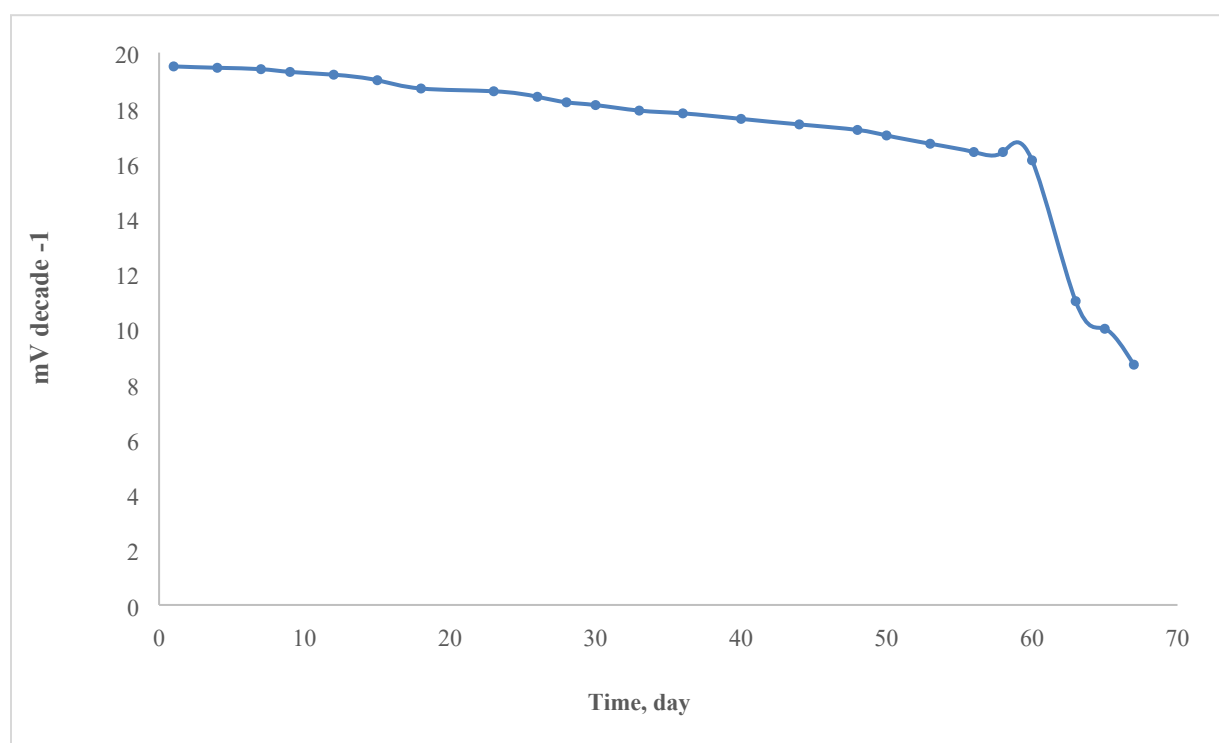

Supplementary Figure S1. Effect of lifetime of the paste on the performance of electrode.

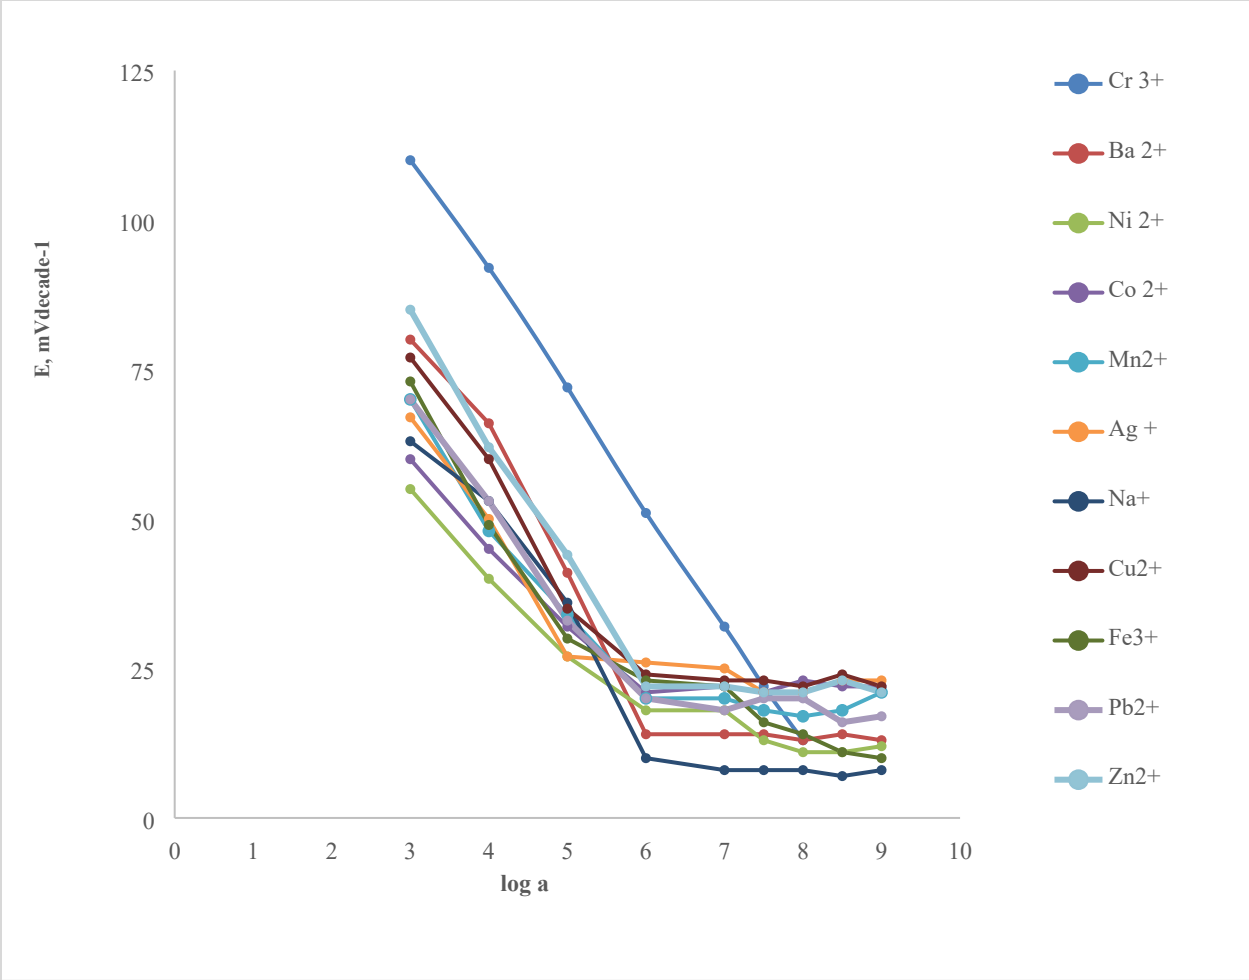

Supplementary Figure S2. The potential response of the proposed sensor for diverse metal ions.

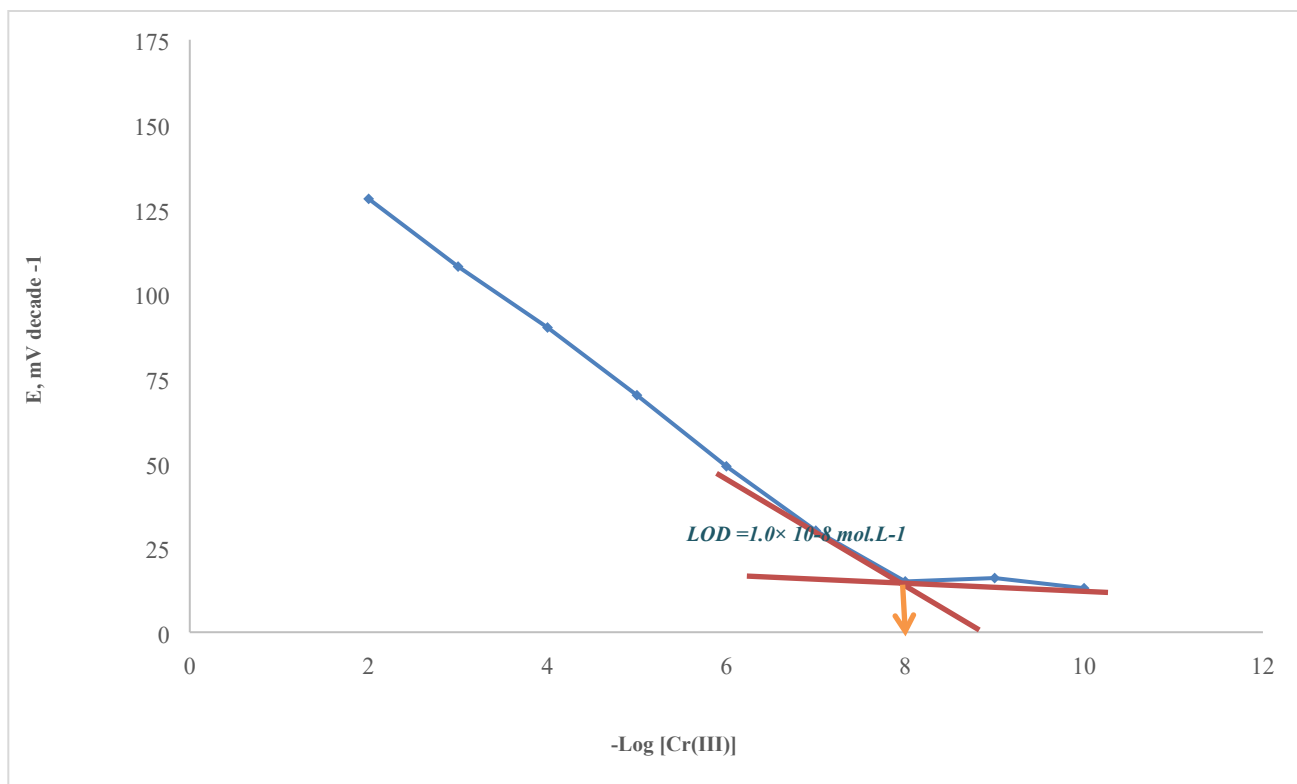

Supplementary Figure S3. The calibration curve of the proposed sensor.

Supplementary Table S1. Effect of content of t-ZrO<sub>2</sub> and plasticizer on the performance of carbon past electrode.

| Graphite (mg) | ZrO <sub>2</sub> (mg) | MgO (%) | Name of plasticizer | Plasticizer (g) | Slope(mV decade <sup>-1</sup> ) | R <sup>2</sup> | Linear range                                |
|---------------|-----------------------|---------|---------------------|-----------------|---------------------------------|----------------|---------------------------------------------|
| 250           | 5                     | 14      | TCP                 | 0.117           | 41.70±0.19                      | 0.886          | 1.0×10 <sup>-5</sup> - 1.0×10 <sup>-3</sup> |
| 250           | 10                    | 14      | TCP                 | 0.117           | 19.50±0.10                      | 0.998          | 1.0×10 <sup>-8</sup> -1.0×10 <sup>-2</sup>  |
| 250           | 15                    | 14      | TCP                 | 0.117           | 30.00±0.50                      | 0.882          | 1.0×10 <sup>-5</sup> -1.0×10 <sup>-3</sup>  |
| 250           | 10                    | 14      | DOP                 | 0.099           | 32.50±0.10                      | 0.890          | 1.0×10 <sup>-5</sup> -1.0×10 <sup>-3</sup>  |
| 250           | 10                    | 14      | NOP                 | 0.104           | 32.70±0.20                      | 0.850          | 1.0×10 <sup>-5</sup> -1.0×10 <sup>-3</sup>  |
| 250           | 10                    | 14      | DBP                 | 0.104           | 48.01±1.20                      | 0.900          | 1.0×10 <sup>-5</sup> -1.0×10 <sup>-3</sup>  |
| 250           | 10                    | 14      | DHP                 | 0.101           | 30.40±1.20                      | 0.811          | 1.0×10 <sup>-5</sup> -1.0×10 <sup>-3</sup>  |

Supplementary Table S2. Summary of factors that affect the performance of the proposed electrode.

| Parameters                    | Value                                                               |
|-------------------------------|---------------------------------------------------------------------|
| Best content                  | 10 mg ZrO <sub>2</sub> 14 %                                         |
| Slope                         | 19.50 ± 0.10 mVdecade <sup>-1</sup>                                 |
| Plasticizer                   | TCP                                                                 |
| Effect of Response time /sec. | 7                                                                   |
| Effect of temperature V/C     | 0.743 × 10 <sup>-3</sup> V/C                                        |
| Effect of pH                  | 2.0-6.0                                                             |
| Effect of lifetime / Days     | 60                                                                  |
| LOD                           | 1.0 × 10 <sup>-8</sup> mol L <sup>-1</sup>                          |
| LOQ                           | 3.33 × 10 <sup>-8</sup> mol L <sup>-1</sup>                         |
| Linearity                     | 1.0 × 10 <sup>-8</sup> - 1.0 × 10 <sup>-2</sup> mol L <sup>-1</sup> |
